# Supplementary material for: Enhanced soot oxidation activity over CuO/CeO2 mesoporous nanosheets
Source: Royal Society of Chemistry journal article supplement (doi:10.1039/c8cy02605j), 2019-01-01
Supplement: c8cy02605j1.pdf [file c8cy02605j1.pdf]

## *Supporting Information*

### **Enhanced soot oxidation activity over CuO/CeO<sub>2</sub> mesoporous nanosheets**

Shuaifeng Yang<sup>1</sup>, Jinguo Wang<sup>1\*</sup>, Wei Chai<sup>2</sup>, Jian Zhu<sup>3</sup>, Yong Men<sup>1</sup>

*<sup>1</sup>College of Chemistry and Chemical Engineering, Shanghai University of Engineering Science, Shanghai 201620, P. R. China*

*<sup>2</sup>Department of Chemical Engineering, Zaozhuang Vocational College, ZaoZhuang 277800, P. R. China*

*<sup>3</sup>The Education Ministry Key Lab of Resource Chemistry, Shanghai Normal University, Shanghai 200234, P. R. China*

\*Author to whom correspondence should be addressed. E-mail address:

Jinguowang1982@sues.edu.cn, Tel: +86-21 6787 4046

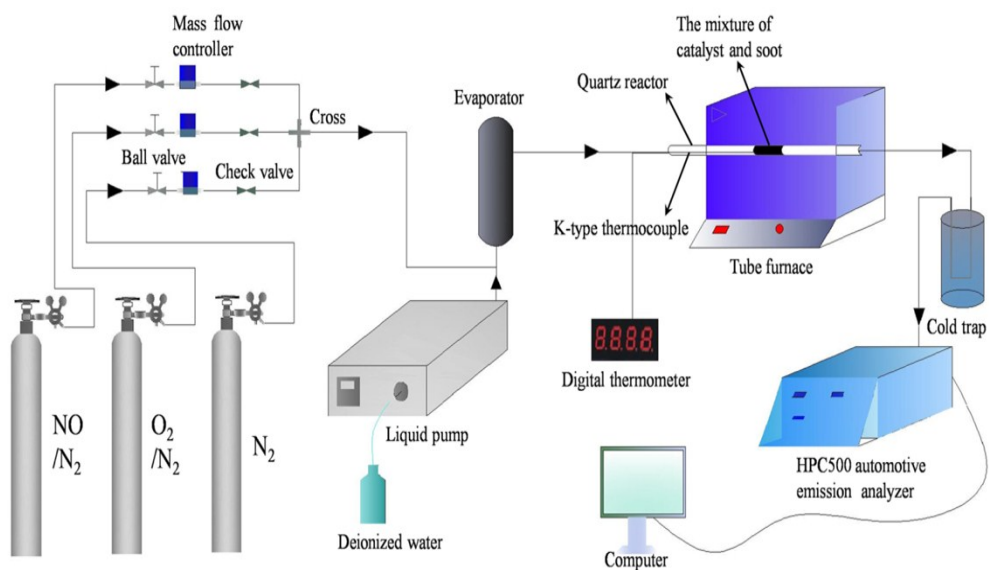

**Fig. S1** Schematic flowing chart of the reaction system for soot oxidation.

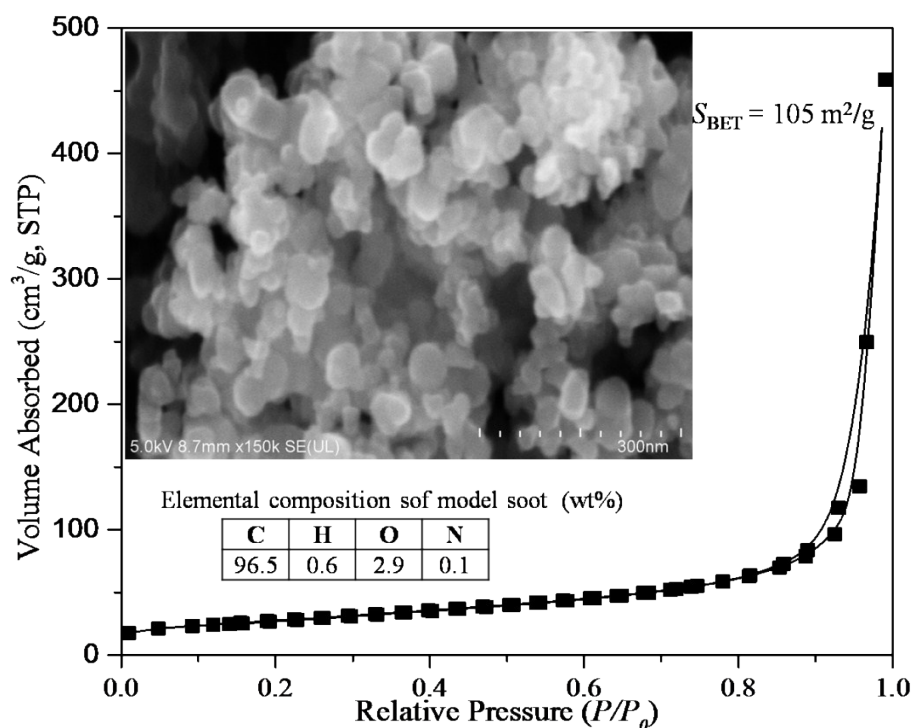

**Fig. S2**  $\text{N}_2$  adsorption-desorption isotherms, FESEM image (inset) and elemental compositions (inset) of pure soot (MA100 Mitsubishi, Japan).

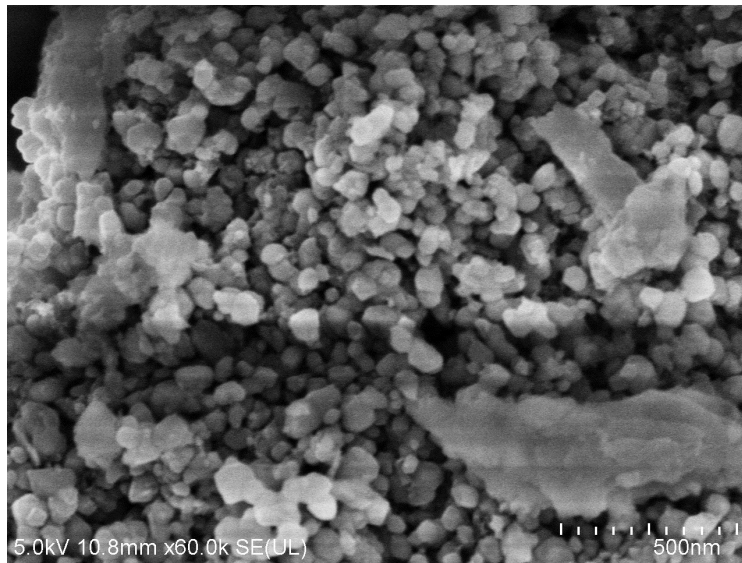

**Fig. S3** FESEM image of crushed CuCe7.2.

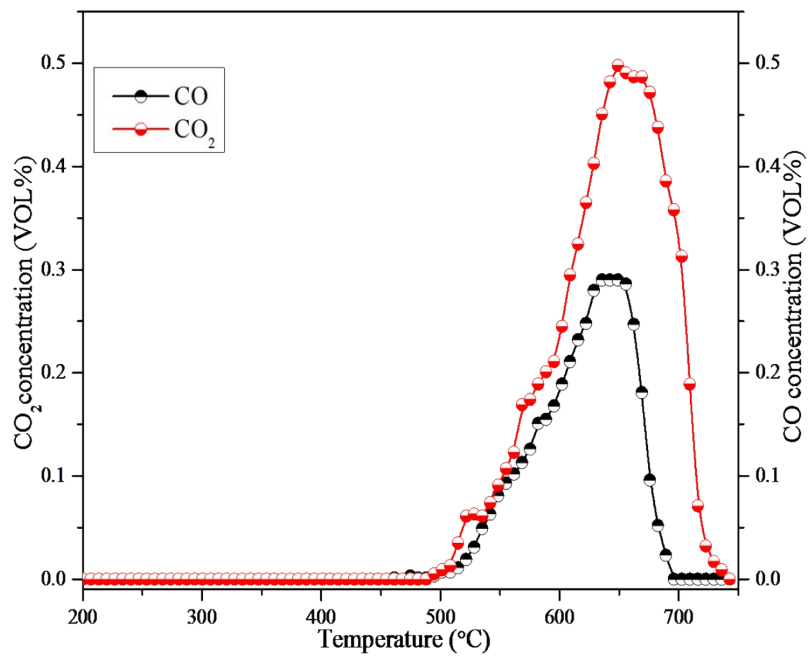

**Fig. S4** Soot oxidation efficiency for pure soot without catalysts.

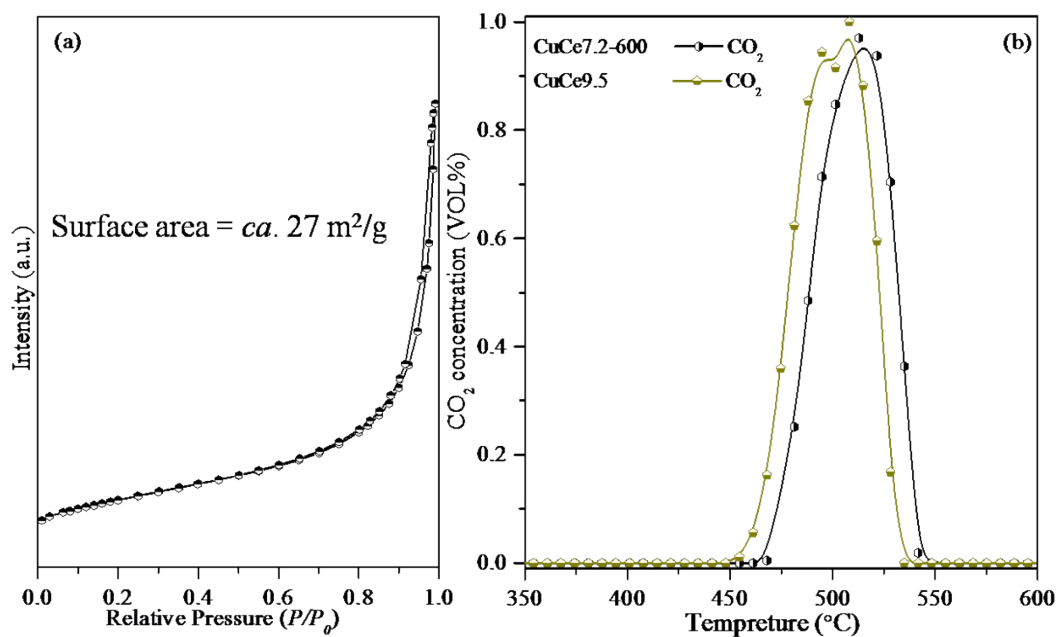

**Fig. S5**  $N_2$  adsorption-desorption isotherms of CuCe7.2-600 (a) and catalytic performances of CuCe7.2-600 and CuCe9.5 (b).

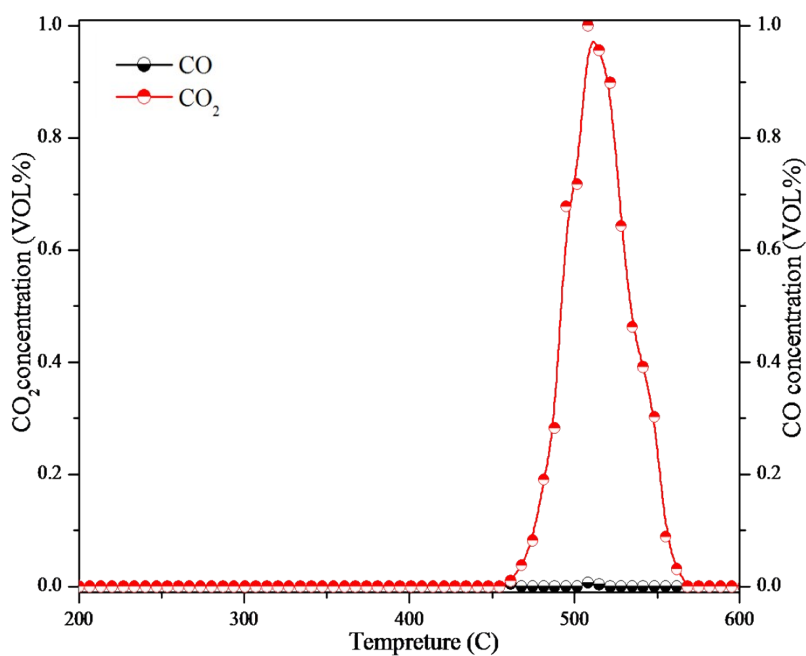

**Fig. S6** Catalytic performances of crushed CuCe7.2 for soot oxidation.

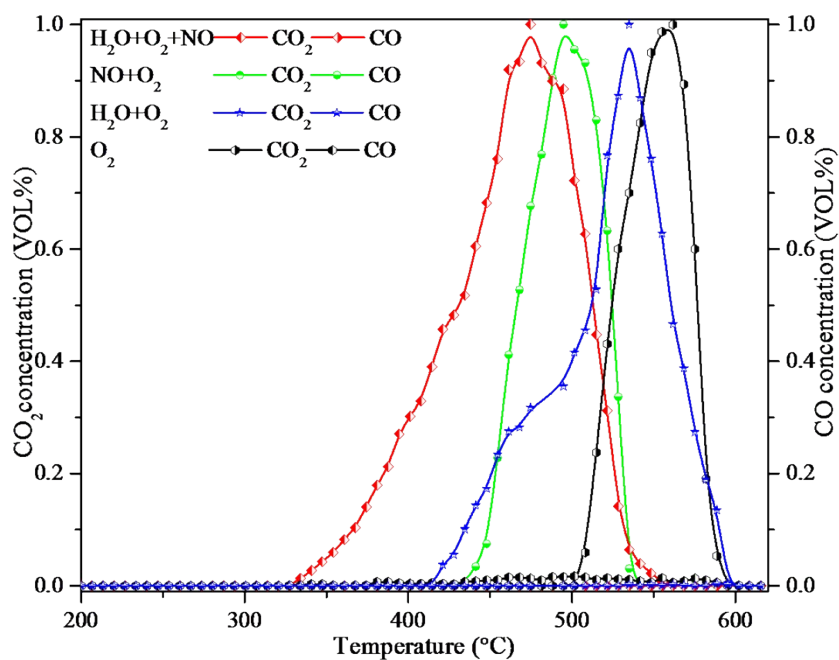

**Fig. S7** Effect of feed composition on soot oxidation activity of crushed CuCe7.2.

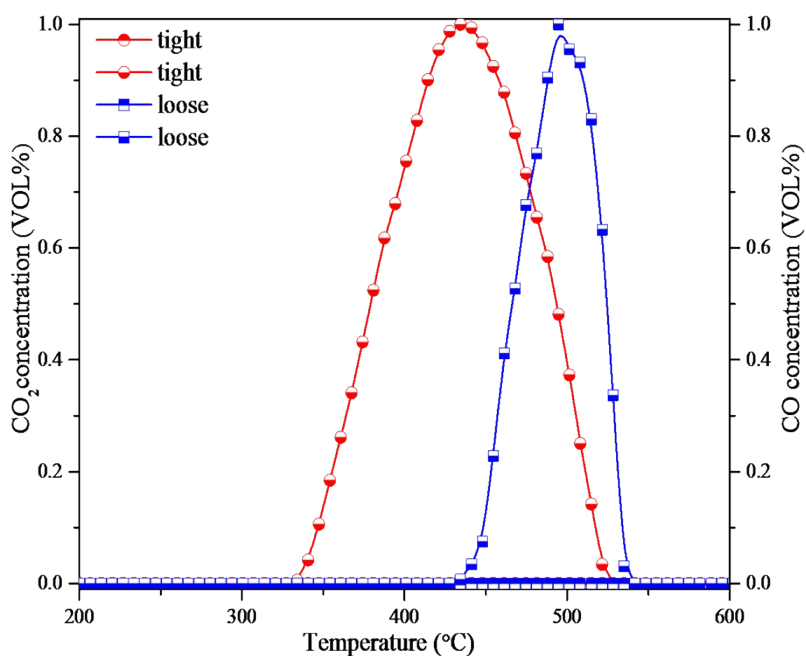

**Fig. S8** Effect of contact mode on soot oxidation activity over CuCe7.2.

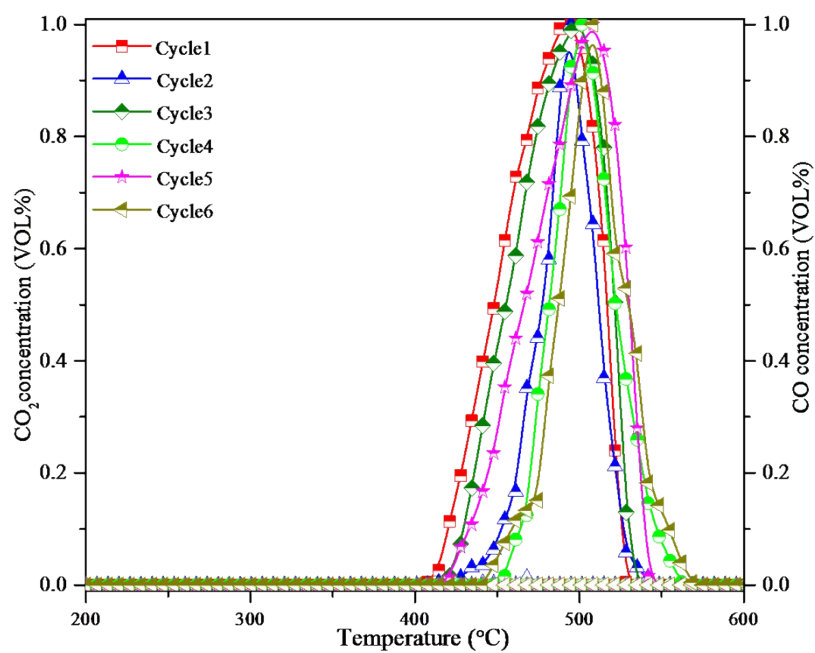

**Fig. S9** Stability test of CuCe7.2 for soot oxidation.

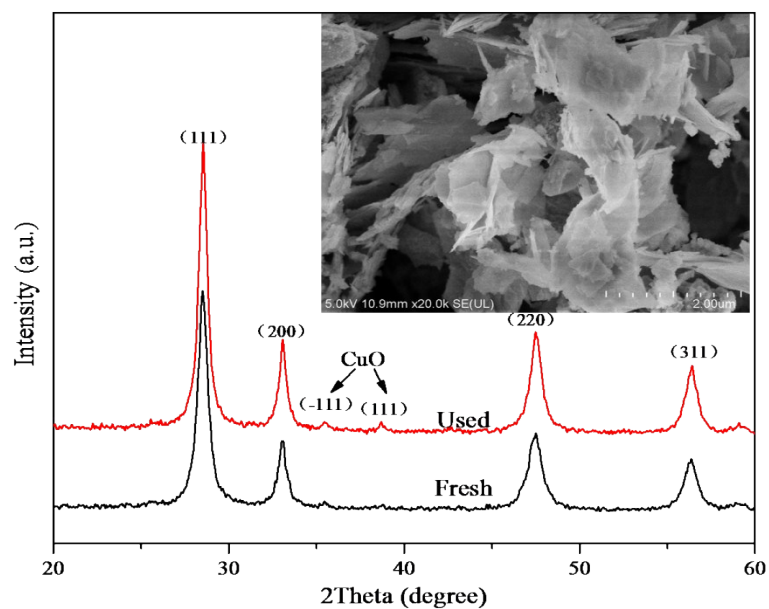

**Fig. S10** XRD pattern and FESEM image of CuCe7.2 after the 6<sup>th</sup> recycle.
